# Supplementary material for: A novel multifunctional polymer ionic liquid as an additive in iodide electrolyte combined with silver mirror coating counter electrodes for quasi-solid-state dye-sensitized solar cells
Source: Royal Society of Chemistry journal article supplement (doi:10.1039/d0ta10826j), 2021-01-01
Supplement: d0ta10826j1.pdf [file d0ta10826j1.pdf]

Supplementary Information

## **A Novel Multifunctional Polymer Ionic Liquid as an Additive in Iodide Electrolyte Combined with Silver-Mirror Coating Counter Electrodes for Quasi-Solid-State Dye-Sensitized Solar Cells**

Fang-Sian Lin,<sup>a</sup> Mani Sakthivel,<sup>b</sup> Miao-Syuan Fan,<sup>b</sup> Jiang-Jen Lin,<sup>c,\*</sup> Ru-Jong Jeng,<sup>a,d,\*</sup> and Kuo-Chuan Ho<sup>a,b,d,\*</sup>

<sup>a</sup> *Institute of Polymer Science and Engineering, National Taiwan University, Taipei 10617, Taiwan*

<sup>b</sup> *Department of Chemical Engineering, National Taiwan University, Taipei 10617, Taiwan*

<sup>c</sup> *Department of Materials Science and Engineering, National Chung Hsing University, Taichung 40227, Taiwan*

<sup>d</sup> *Advanced Research Center for Green Materials Science and Technology, National Taiwan University, Taipei 10617, Taiwan*

\*Corresponding author:

E-mail: jianglin@ntu.edu.tw; Fax: +886-4-2285-7017; Tel: +886-4-2285-6293

E-mail: rujong@ntu.edu.tw; Fax: +886-2-3366-5237; Tel: +886-2-3366-5884

E-mail: kcho@ntu.edu.tw; Fax: +886-2-2362-3040; Tel: +886-2-2366-0739

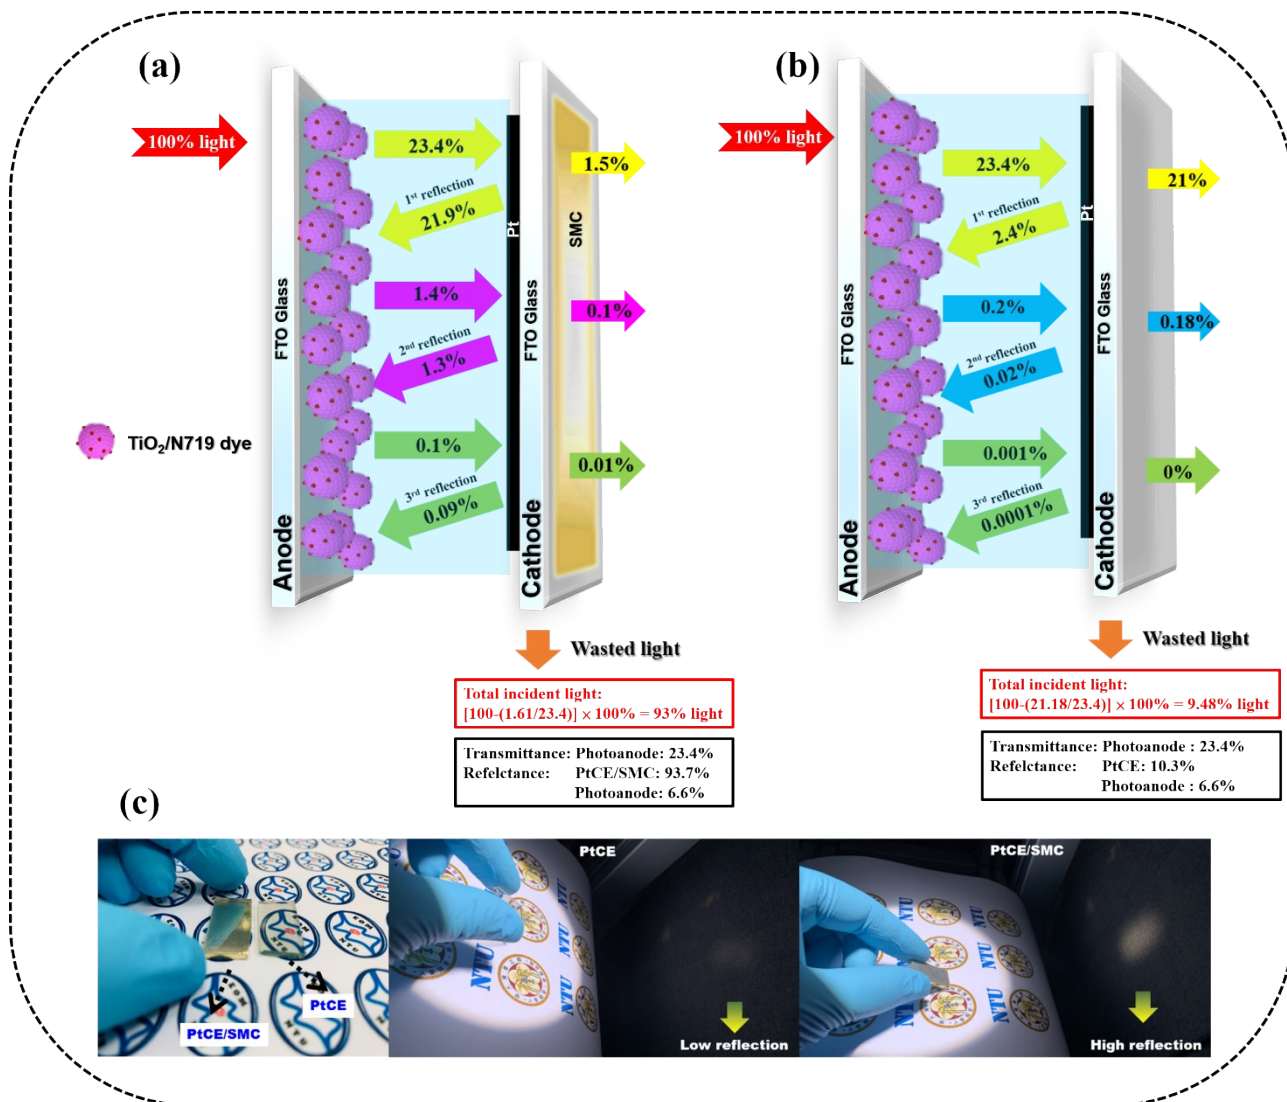

**Scheme S1** The schematic shows the percentage of total incident light corresponding to different counter electrodes after three reflections of incident light for a DSSC with (a) silver mirror counter electrode (PtCE/SMC) (b) platinum counter electrode (PtCE) and (c) digital photographical images for PtCE/SMC and PtCE and their light reflection process.

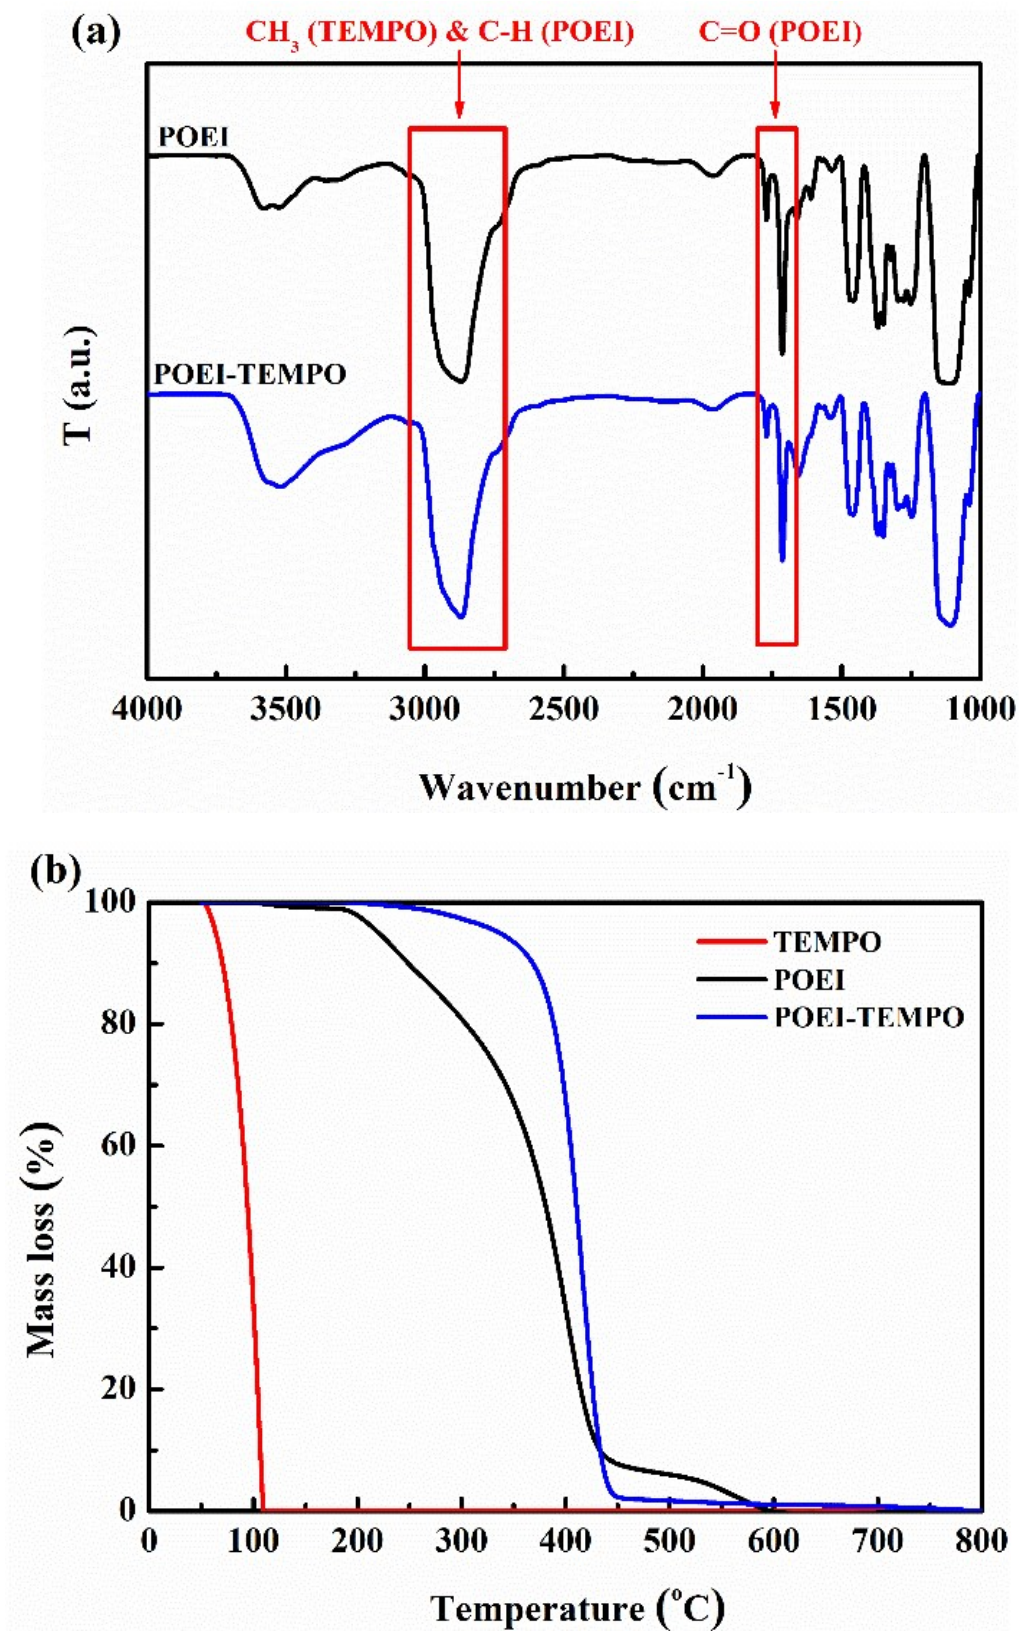

**Fig. S1** (a) FT-IR and (b) thermogravimetric analysis curves for the TEMPO, POEI, and POEI-TEMPO.

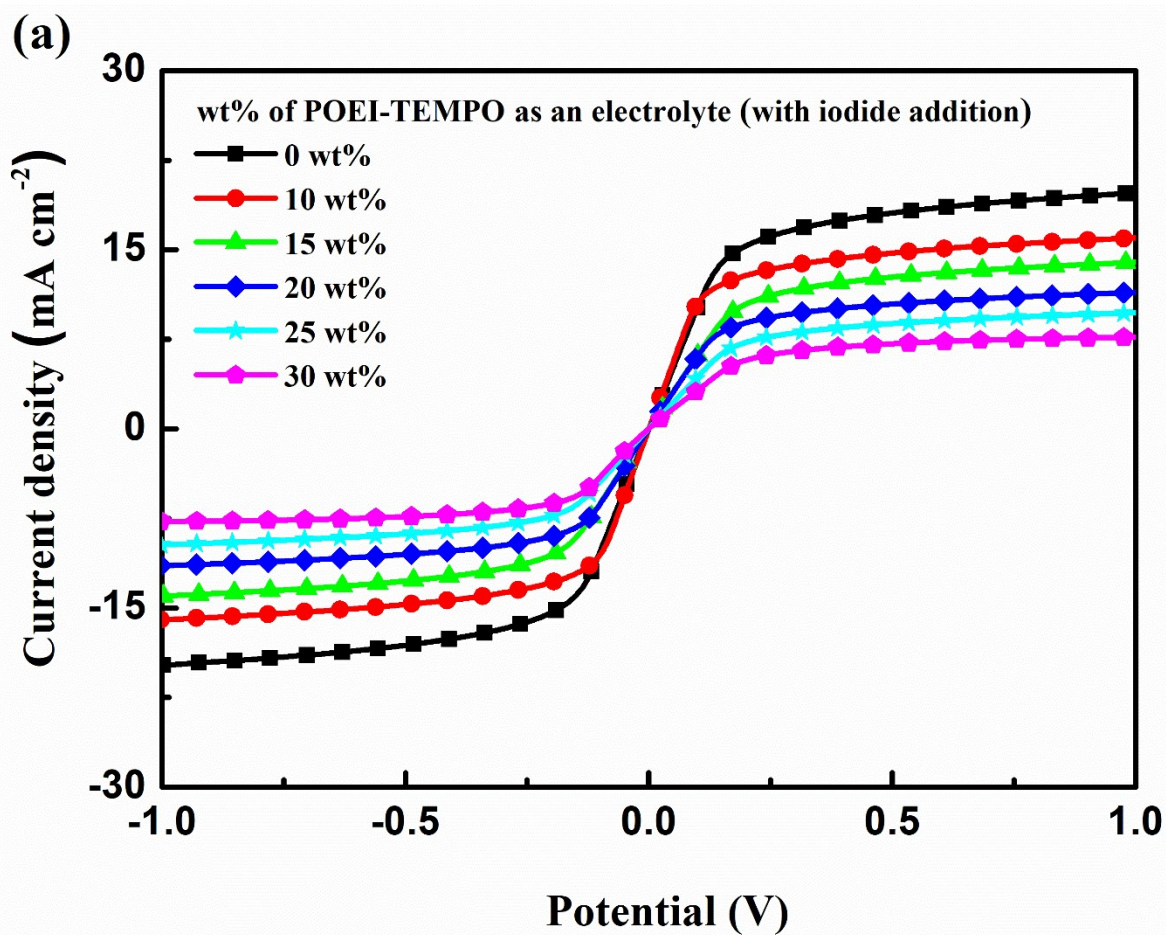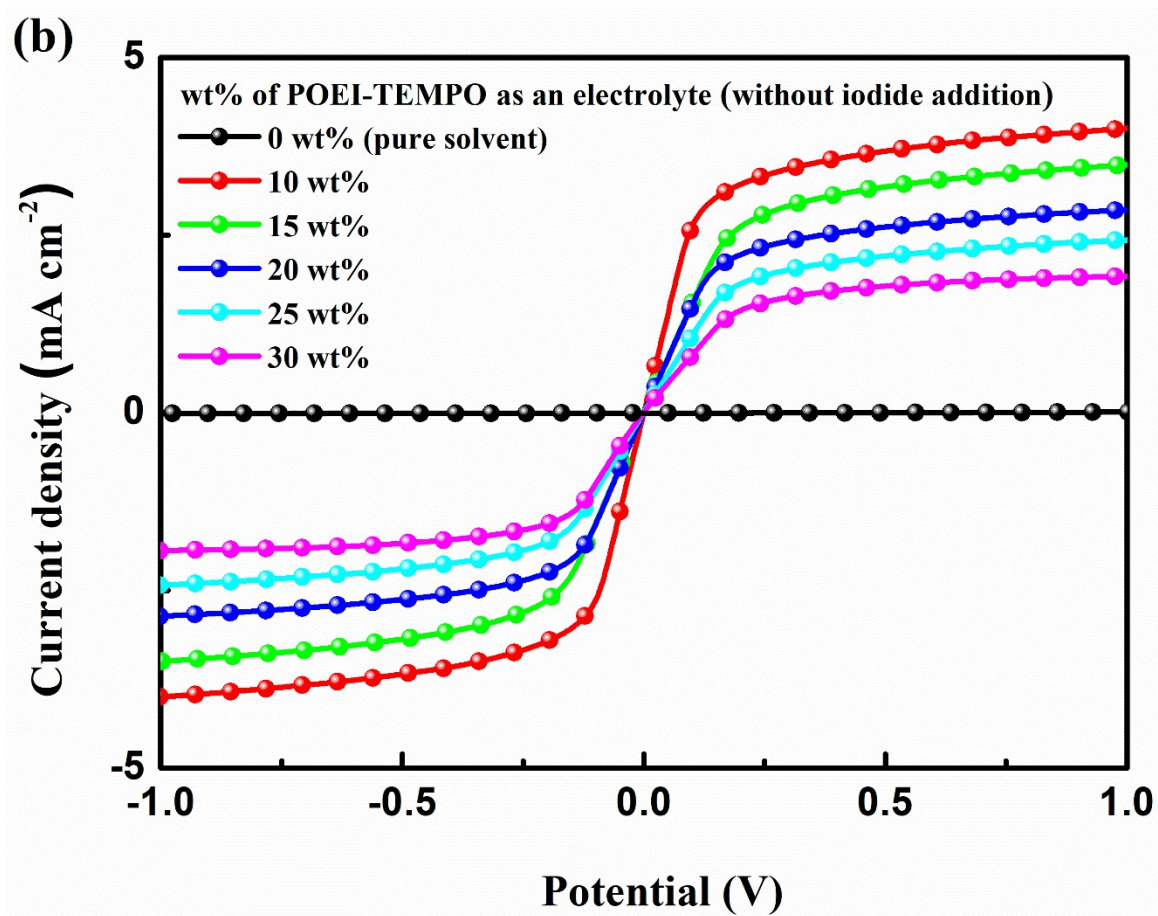

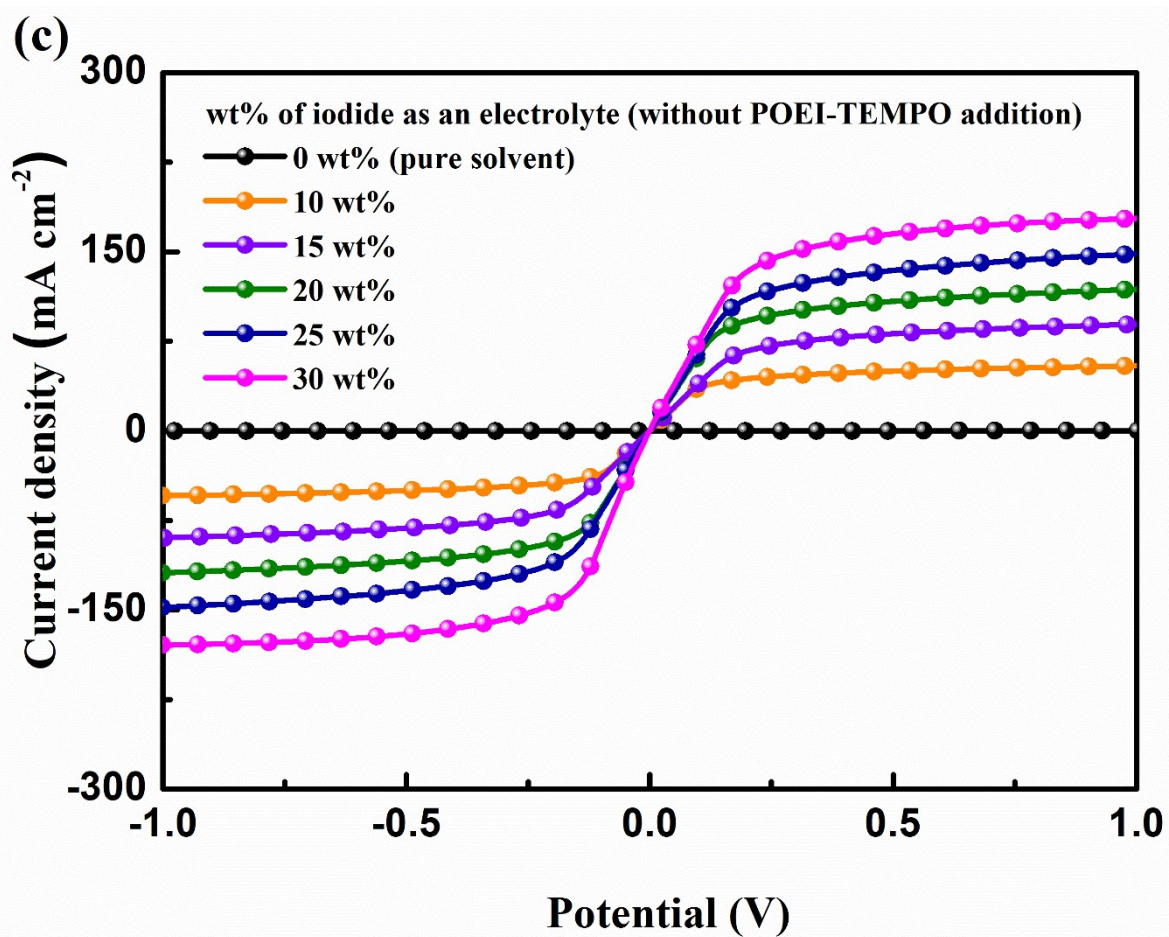

Fig. S2 Linear sweep voltammetry curves of (a) POEI-TEMPO coupled with iodide (b) pristine POEI-TEMPO (c) pristine iodide addition as the electrolytes, at a scan rate of 10 mV s<sup>-1</sup>.

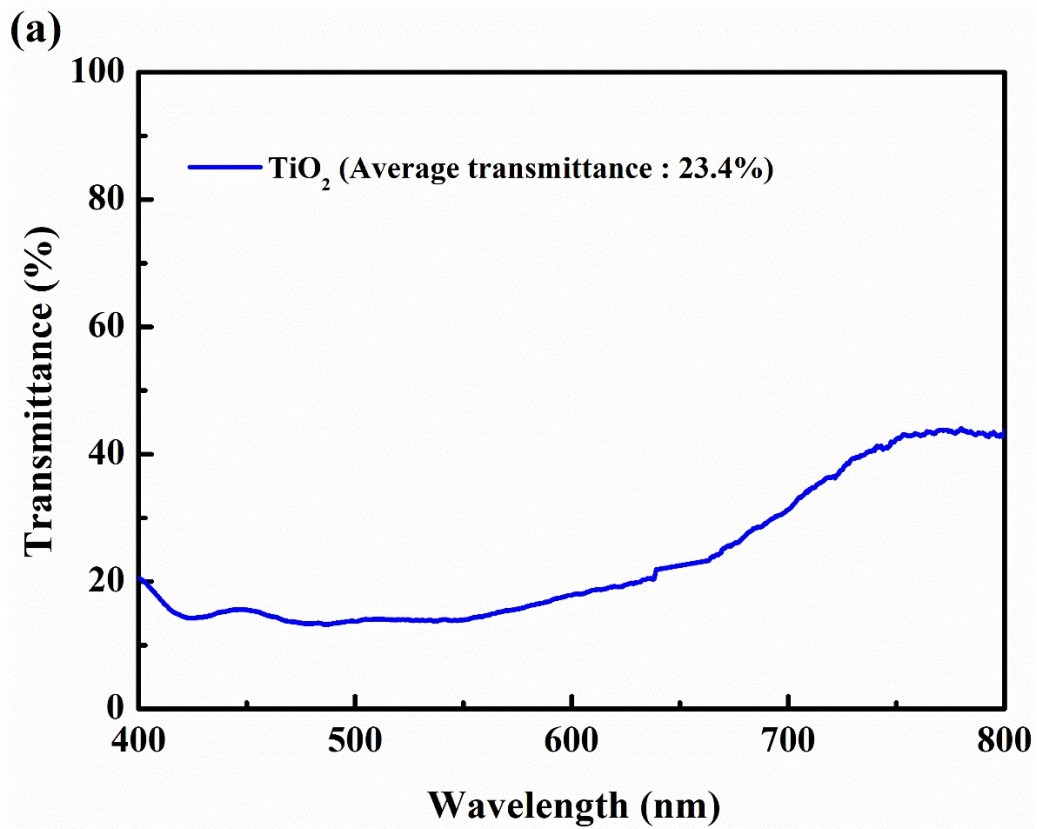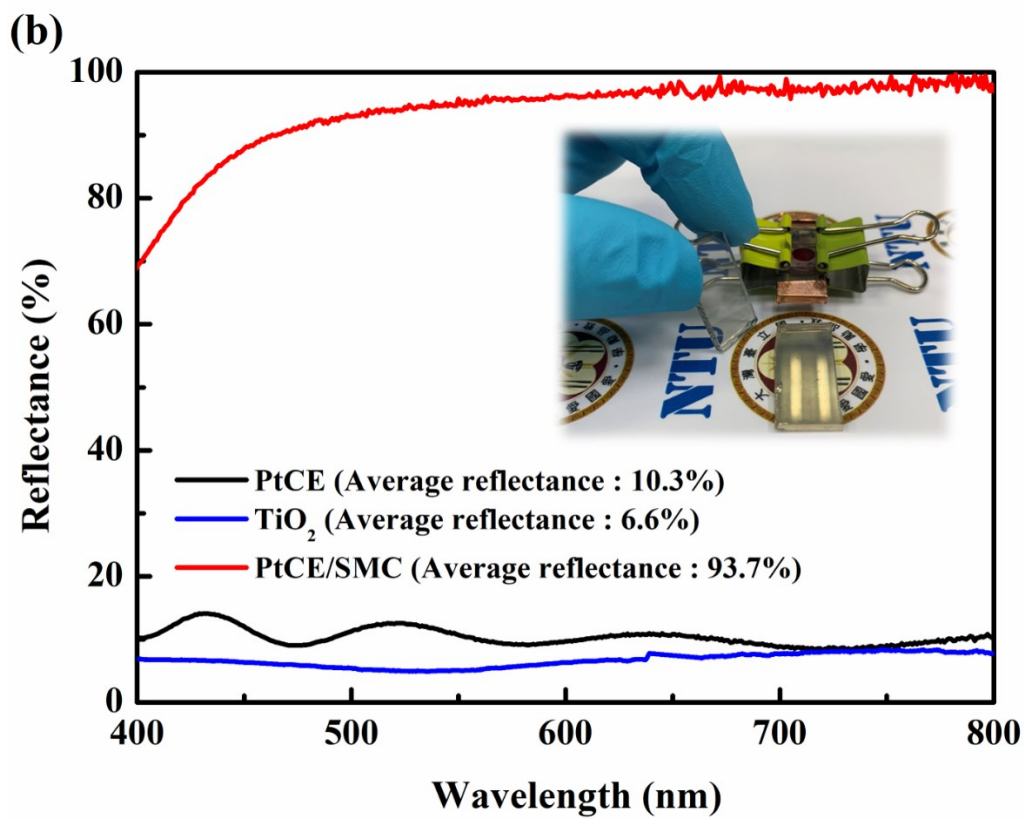

**Fig. S3** UV-Vis spectra of (a) only TiO<sub>2</sub> photoanode transmittance and (b) reflectance of TiO<sub>2</sub> photoanode and different counter electrodes PtCE and PtCE/SMC. The inset contains the photographical image of PtCE, PtCE/SMC and fabricated cell.
